# Supplementary material
Source: MDPI journal article supplement (https://www.mdpi.com/2073-4441/9/11/841)
Supplement: s1 [file s1]

# Supplementary Materials: Enhancing the Economic Value of Large Investments in Sustainable Drainage Systems (SuDS) through Inclusion of Ecosystems Services Benefits

Santiago Urrestarazu Vincent <sup>1,2</sup>, Mohanasundar Radhakrishnan <sup>1</sup>, Laszlo Hayde <sup>1</sup> and Assela Pathirana <sup>1,\*</sup>

A detailed calculation of Cost and Benefits of SuDS and conventional drainage system in Montevideo, Uruguay are presented in this section. All the costs and benefits are based on the local rates of construction materials and labour charges that are prevalent in Montevideo and Buenos Aires, which were collected from green roof module suppliers such as Verdefacil, Maria Pietranera; consultancies such as CSI Ingenieros S.A; and from Municipality of Montevideo.

The total costs of Sustainable drainage systems (SuDS):

$$TC = \sum_{i=1}^n Nr_i \times C_i$$

Where,

$TC$  : total cost of SuDS (US\$),

$n$  : number of types of SuDS elements considered,

$Nr_i$  : number of units (or square meters) of the  $i^{th}$  SuDS element ,

$C_i$  : unit costs (US\$/m<sup>2</sup> or US\$/unit) of the  $i^{th}$  SuDS element, which is already the PV of all initial and future costs.

Also the benefits are calculated on an area or unit basis (i.e. US\$/m<sup>2</sup> or US\$/unit). For a particular candidate solution, the total present value of the ES benefits:

$$TESB = \sum_{i=1}^n Nr_i \times ESB_i$$

Where,

$TESB$  : total ES benefits of SuDS (US\$),

$n$  : number of types of SuDS elements considered,

$Nr_i$  : number of units (or square meters) of the  $i^{th}$  SuDS element,

$ESB_i$  : unit Ecosystem Services' benefits (US\$/m<sup>2</sup> or US\$/unit) of the  $i^{th}$  SuDS element. Note that this is already the PV of all initial and future benefits.

**Table S1.** Characteristics and costs of designed underground storages

| Storage                                                                                                             | Depth (m) | Area (m2) | Total cost (a) (US\$) | Total unit cost (US\$/m2) | Total unit cost (US\$/m3) |
|---------------------------------------------------------------------------------------------------------------------|-----------|-----------|-----------------------|---------------------------|---------------------------|
| Liceo                                                                                                               | 4.0       | 3,170     | 4,042,450             | 1,275                     | 319                       |
| Quijote                                                                                                             | 3.6       | 1,500     | 2,817,877             | 1,879                     | 522                       |
| Conservación                                                                                                        | 3.7       | 1,800     | 3,017,139             | 1,676                     | 453                       |
| <sup>a</sup> Includes all the works: inlet and outlet structures, electromechanic devices, urban conditioning, etc. |           |           |                       |                           |                           |

**Table S2.** Costs of green roofs

| Item                                | Private Cost<br>(US\$/m <sup>2</sup> ) | Social Cost<br>(US\$/m <sup>2</sup> ) | Total Cost<br>(US\$/m <sup>2</sup> ) |
|-------------------------------------|----------------------------------------|---------------------------------------|--------------------------------------|
| Investment - Green roof with plants | 70                                     | -                                     | 70                                   |
| Maintenance                         | 54                                     | -                                     | 54                                   |
| Air pollution                       | -                                      | 18                                    | 18                                   |
| Landfill cost                       | -                                      | 0.02                                  | 0                                    |
| Total                               | 124                                    | 18                                    | 142                                  |

**Table S3.** Costs of rain barrels

| Item                                   | Cost (US\$) |
|----------------------------------------|-------------|
| Rain barrel with sealed top            | 121         |
| Tee 110 mm                             | 10          |
| 1 m Pipe 110 mm                        | 6           |
| Bend 45 110 mm                         | 5           |
| Filter 110 mm                          | 15          |
| Stand                                  | 50          |
| Labour                                 | 30          |
| Maintenance                            | 63          |
| Total cost (US\$)                      | 300         |
| Cost per volume (US\$/m <sup>3</sup> ) | 500         |

**Table S4.** Ecosystem services' benefits of green roofs

| Item                                                                                         | Private Benefit<br>(US\$/m <sup>2</sup> ) | Social Benefit<br>(US\$/m <sup>2</sup> ) | Total Benefit<br>(US\$/m <sup>2</sup> ) |
|----------------------------------------------------------------------------------------------|-------------------------------------------|------------------------------------------|-----------------------------------------|
| Reduced building energy consumption for cooling & heating                                    | 16.1                                      | -                                        | 16.1                                    |
| Private land and property values uplift                                                      | 71.4                                      | -                                        | 71.4                                    |
| Food production                                                                              | 6.4                                       | -                                        | 6.4                                     |
| Longevity of roofs                                                                           | 30.2                                      | -                                        | 30.2                                    |
| Avoided carbon emissions from building energy saving                                         | -                                         | 3.8                                      | 3.8                                     |
| Energy and carbon emissions savings from reduced storm water volume entering combined sewers | -                                         | 0.1                                      | 0.1                                     |
| Avoided costs for air pollution control measures                                             | -                                         | 1.7                                      | 1.7                                     |
| Aesthetics                                                                                   | -                                         | 2.5                                      | 2.5                                     |
| TOTAL                                                                                        | 124.1                                     | 8.0                                      | 132.1                                   |

**Table S5.** Ecosystem services' benefits of rain barrels

| Item                      | Private benefit<br>(US\$/barrel) | Social benefit<br>(US\$/barrel) | Total benefit<br>(US\$/barrel) |
|---------------------------|----------------------------------|---------------------------------|--------------------------------|
| Main water saving         | 123                              | -                               | 123                            |
| Energy & Emissions saving | -                                | 2                               | 2                              |
| Total                     | 123                              | 2                               | 125                            |

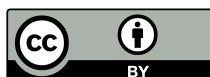

© 2017 by the authors. Submitted for possible open access publication under the terms and conditions of the Creative Commons Attribution (CC BY) license (<http://creativecommons.org/licenses/by/4.0/>).
